1 Characterisation of a *Teladorsagia circumcincta* glutathione transferase

2

3

4

5 Saleh Umair<sup>a\*</sup>, Charlotte L.G. Bouchet<sup>a</sup>, Qing Deng<sup>a</sup>, Nikola Palevich<sup>a</sup>, Heather V.

6 Simpson<sup>b</sup>

7

8

9

10 <sup>a</sup>AgResearch Ltd, Private Bag 11-008, Palmerston North, New Zealand

11 <sup>b</sup>Institute of Veterinary, Animal and Biomedical Sciences, Massey University, Private

12 Bag 11-222, Palmerston North, New Zealand

13

14

15

16

17

18

19

20

21 \* Corresponding author

22 Saleh Umair, AgResearch Ltd, Hopkirk Research Institute, Grasslands Research

23 Centre, Tennent Drive, Private Bag 11008, Palmerston North 4442, New Zealand.

24 E-mail: [saleh.umair@agresearch.co.nz](mailto:saleh.umair@agresearch.co.nz)

25

26 ABSTRACT

27

28 A 615 bp full length cDNA encoding a *Teladorsagia circumcincta* glutathione  
29 transferase (*TcGST*) was cloned, expressed in *Escherichia coli* and the recombinant  
30 protein purified and its kinetic properties determined. The predicted protein consisted  
31 of 205 amino acids and was present as a single band of about 24 kDa on SDS-PAGE.  
32 Multiple alignments of the protein sequence of *TcGST* with homologues from other  
33 helminths showed that the highest identity of 53-68% with haem-binding nematode  
34 proteins designated as members of the nu class of GSTs. Substrate binding sites and  
35 conserved regions were identified and were generally conserved. The predicted 3-  
36 dimensional structures of *TcGST* and *HcGST* revealed highly open binding cavities  
37 typical of this class of GST, considered to allow greater accessibility to diverse  
38 ligands compared with other classes of GST. At 25 °C, the optimum pH for *TcGST*  
39 activity was pH 7, the  $V_{\max}$  was  $1535 \pm 33$  nmoles.min<sup>-1</sup>.mg<sup>-1</sup> protein and the apparent  
40  $K_m$  for the substrate 1-chloro-2,4-dinitrobenzene (CDNB) was  $0.22 \pm 0.01$  mM (mean  
41  $\pm$  SD, n = 2). Antibodies in both serum and saliva from field-immune, but not  
42 nematode-naïve, sheep, recognised recombinant *TcGST* in enzyme-linked  
43 immunosorbent assays. The recognition of the recombinant protein by antibodies  
44 generated by exposure of sheep to the native enzyme indicates similar antigenicity of  
45 the two proteins. These findings could aid in the design of novel drugs and vaccine  
46 antigens for economically important parasites of livestock.

47

48 Keywords: *Teladorsagia circumcincta*; Glutathione transferase; GST; Cloning;  
49 Expression; ELISA; Kinetic properties

50

51 **1. Introduction**

52

53 Glutathione transferases (GSTs) (E.C. 2.5.1.18) are a large superfamily of  
54 enzymes, which have the principal function of protecting cells against oxidative stress,  
55 toxic, carcinogenic and mutagenic effects of endogenous substances and xenobiotics  
56 (Hayes and Pulford, 1995). The detoxification reactions involve the catalysis by GSTs  
57 of the conjugation of many electrophilic substances to the thiol group of the tripeptide  
58 glutathione (L- $\gamma$ -glutamyl-L-cysteinylglycine) (Sheehan et al., 2001; Hayes et al., 2005;  
59 Deponte, 2013), followed by removal of the conjugated chemicals from the cells by  
60 transporters (Cole and Deeley, 2006). Additional functions of particular classes of  
61 GSTs include binding to hydrophobic molecules, modifying immune functions and  
62 participating in cellular metabolism and signalling (Brophy and Barrett, 1990; Board  
63 and Menon, 2013).

64 GSTs are universally present in bacteria and eukaryotes, in which multiple  
65 classes of the enzyme are expressed, although some classes have restricted  
66 distributions. The superfamily includes distantly related families of cytosolic GSTs  
67 (alpha, mu, omega, pi, sigma, theta and zeta), as well as mitochondrial/microsomal  
68 enzymes (kappa GSTs) and membrane-bound glutathione and eicosanoid metabolising  
69 enzymes (Hayes and Pulford, 1995; Sheehan et al., 2001; Hayes et al., 2005; Board and  
70 Menon, 2013). Proteins in the same cytosolic GST class have sequence identity of at  
71 least 40%, contrasting with less than 25% between classes (Oakley, 2011). The  
72 cytosolic enzymes are mainly responsible for detoxification, with the different classes  
73 showing a range of substrate affinities (Deponte, 2013). Other specific activities  
74 include immune modulation by the theta class of GSTs, which are MIF (macrophage  
75 migration inhibitory factor) protein homologues (Blocki et al., 1993), and the sigma

76 GSTs, which have both pro- and anti- inflammatory functions in mammals and an  
77 immunomodulatory role in helminths (Flanagan and Smythe, 2011). The mitochondrial  
78 kappa GSTs are involved in energy and lipid metabolism (Petit et al., 2009; Morel and  
79 Aninat, 2011).

80 Many helminths express multiple GSTs, homologues of most classes of  
81 enzymes; these have been characterised using genomic and proteomic approaches  
82 (Brophy and Pritchard, 1994; Sheehan et al., 2001; Markov et al., 2015; Bae et al.,  
83 2016; Matoušová et al., 2016). Genome-wide sequencing is possible for some  
84 helminths and has allowed analysis of gene homology across the phylum (Campbell et  
85 al., 2001) and revealed the large number of genes encode for GSTs, e.g. around 50  
86 different GST proteins in *Caenorhabditis elegans* (Markov et al., 2015). Detoxification  
87 of anthelmintic drugs by the numerous cytosolic GSTs is protective of internal parasites  
88 (Matoušová et al., 2016). MIF proteins (theta GSTs) have been identified in numerous  
89 species of helminth (Sparkes et al., 2017) and these proteins can modulate host immune  
90 responses to promote parasite survival (Matoušová et al., 2016). A family of haem-  
91 binding proteins, which also bind haematin, in the ruminant nematode *Haemonchus*  
92 *contortus* (van Rossum et al., 2004) and hookworms of the genera *Necator* and  
93 *Ancylostoma* (Zhan et al., 2005; Goud et al., 2012) have been assigned to the nu family,  
94 which may be a nematode-specific class, or possibly a subfamily of the sigma class  
95 (Markov et al., 2015).

96 Development of vaccines against parasitic helminths is an alternative control  
97 strategy to counter widespread anthelmintic resistance. Recombinant GST vaccines  
98 have provoked high levels of immune response and protection against cestode  
99 (Preyavichyapugdee et al., 2008) and hookworm infections (Zhan et al., 2005),  
100 suggesting GSTs could also be used in vaccines against other parasites. In the present

101 study, the cDNA encoding a *Teladorsagia circumcincta* glutathione transferase  
102 (*TcGST*) was cloned, expressed in *Escherichia coli* and the recombinant protein was  
103 produced and purified. *TcGST* was verified as a GST protein by determining its kinetic  
104 properties in catalysing the conjugation of CDNB (1-chloro-2,4-dinitrobenzene) to the  
105 thiol group of L-glutathione. Enzyme-linked immunosorbent assays (ELISAs) were  
106 performed to determine if the recombinant protein was recognised by saliva and serum  
107 from sheep previously exposed to nematode parasites in the field.

108

## 109 **2. Materials and methods**

110

111 All chemicals were purchased from the Sigma Chemical Co. (Mo, USA)  
112 unless stated otherwise. Use of experimental animals for culturing and harvesting adult  
113 worms for RNA extraction has been approved by the AgResearch Grasslands Animal  
114 Ethics Committee (protocol #13052).

115

### 116 *2.1. Parasites*

117 Pure cultures of *T. circumcincta* were maintained in the laboratory by regular  
118 passage through sheep. Adult worms were recovered from the abomasa of infected  
119 sheep as described previously (Umair et al., 2013). Briefly, abomasal contents were  
120 mixed 2:1 with 3% agar and the solidified agar blocks incubated at 37°C in a saline  
121 bath. Clumps of parasites were collected from the saline soon after emergence and  
122 frozen in Eppendorff tubes at -80°C for molecular biology procedures.

123

### 124 *2.2. RNA isolation and synthesis of cDNA*

125 Adult *T. circumcincta* (50-100 µl packed volume) in 1 ml Trizol (Life  
126 Technologies) were ground to a fine powder in a mortar under liquid N<sub>2</sub> and total RNA  
127 extracted according to the manufacturer's instructions. The quality and concentration  
128 of the RNA was assessed, and first strand was synthesised from 1µg using the iScript  
129 Select cDNA Synthesis Kit (Bio-Rad) and a 1:1 mixture of Oligo (dT)<sub>20</sub> and random  
130 primers. A full-length *T. circumcincta* GST sequence TDC00922-1 (AgResearch's  
131 Internal database) was amplified from cDNA in a PCR containing the oligonucleotide  
132 primers *TcGST-FL-F* (5'- ATCGCATATGGTTCACTACAGACTGCTT -3') and  
133 *TcGST-FL-R* (5'- CGATGCGGCCGCGAATGGTGTGTTC -3') and cloned into the  
134 expression vector AY2.4 (Knight et al., 2004), using the restriction enzymes NdeI and  
135 NotI (inserted into the forward and reverse primers, underlined in primer sequences,  
136 respectively) to allow the production of N-terminal His-tagged recombinant protein.  
137 The expression clone was sequenced to confirm the sequence identity.

138 Alignments were performed using the Muscle alignment option in Geneious  
139 Prime (Biomatters Ltd) with the Blosum 62 similarity matrix used to determine 100%  
140 similarity to a *H. contortus* amino acid sequence and other helminth GSTs. A second  
141 alignment against the Protein Data Bank (PDB) was carried out using the Position-  
142 Specific Iterative Basic Local Alignment Search Tool (PSI-BLAST) (Altschul et al.  
143 1997).

### 144 2.3. Protein modelling and structural analysis of *TcGST*

145 PSI-BLAST was used to compare the *TcGST* and *HcGST* protein sequences  
146 with deposited structures in the PDB. A structural model of *TcGST* was constructed by  
147 submitting the amino acid sequence obtained to the I-TASSER server (Yang et al.,  
148 2015). For comparison, the amino acid sequence of the *H. contortus* GST (locus tag

149 HCON\_NP\_LOC15789), located on chromosome 2 (GenBank accession number  
150 [CP035801](#), BioProject accession number [PRJNA517503](#)) from the *H. contortus*  
151 NZ\_Hco\_NP genome v1.0 (Palevich et al., 2019a,b), was modelled and described as *H.*  
152 *contortus* GST. The structural model with highest C- and TM-score was further  
153 validated using Procheck (Laskowski et al., 1996) and ProSA-web (Wiederstein and  
154 Sippl, 2007). TM-score is a metric for measuring the similarity of two protein  
155 structures, or a global fold similarity between the generated model and the structure it  
156 was based on. Scores higher than 0.5 assumes the parent structure and modelled protein  
157 share the same fold while below 0.17 suggests a random nature to the produced model  
158 (Zhang and Skolnick, 2004). C-score is a confidence score for estimating the quality of  
159 predicted models by I-TASSER. It is calculated based on the significance of threading  
160 template alignments and the convergence parameters of the structure assembly  
161 simulations. C-score is typically in the range of -5 to 2, where a C-score of higher value  
162 signifies a model with a high confidence and vice-versa. The substrate binding domain  
163 was identified and active site residues were deduced and pictured using the PyMol  
164 molecular graphics system version 1.0 (Schrodinger).

#### 165 2.4. Expression of *T. circumcincta* recombinant TcGST in *E. coli*

166 *E. coli* strain BL21 (DE3) were transformed with *E. coli* AY2.4 TcGST and  
167 grown in 10 ml Luria Broth (LB) supplemented with 100 µg/ml ampicillin for 16 h at  
168 37 °C and 250 rpm. The culture was diluted 20-fold in LB with 100 µg/ml ampicillin  
169 and grown to OD<sub>600</sub> 0.6-0.8 at 37 °C and 250 rpm. L-arabinose was added to a final  
170 concentration of 0.2% and the culture grown for an additional 3 h at 37 °C and 250 rpm.  
171 Bacteria were harvested by centrifugation at 5,000 g for 10 min at 4 °C. The pellet was  
172 weighed and the bacteria resuspended (10 g/ml) in equilibration buffer (20 mM sodium  
173 biphosphate, 0.5 M NaCl, 20 mM imidazole, pH 7.4). Protease inhibitors were added

174 to the suspension, which was then passed through the chamber of a MP110  
175 Microfluidizer® (Microfluidics, USA) seven times consecutively under ice at 20,000  
176 psi to ensure the full lysis of *E.coli*, as recommended by the manufacturer. The crude  
177 lysate was centrifuged at 15,000 *g* for 20 min at 4 °C to remove cell debris and the  
178 supernatant filtered through a 0.22 µm filter prior to purification.

179

## 180 *2.5. Purification of recombinant TcGST*

181 Purified recombinant polyhistidine protein was obtained by fast protein liquid  
182 chromatography (FPLC) under native conditions, using a Ni-NTA column (Qiagen),  
183 coupled to the Biologic DUO-FLOW BIO-RAD chromatography system (Bio-Rad,  
184 USA). Sodium biphosphate buffer was used as an equilibration buffer, sodium  
185 biphosphate containing 20 mM imidazole as the wash buffer, and sodium biphosphate  
186 containing 500 mM imidazole as elution buffer. The protein was dialysed overnight  
187 following the elution and the concentration was determined by the Nanodrop A280 nm  
188 assay, using the extinction coefficient 32890 M<sup>-1</sup>cm<sup>-1</sup> and molecular weight 23.5 KDa.

189

## 190 *2.6. Gel electrophoresis*

191 SDS-PAGE was performed using NuPAGE Novex 4-12% Bis-Tris gels  
192 according to the instructions of the manufacturer (Life Technologies). Gels were  
193 stained with Coomassie Blue (Life Technologies). A western blot was performed on  
194 the purified protein, using a monoclonal anti-polyhistidine-peroxidase antibody. Blots  
195 were incubated overnight in 1:2000 antibody in buffer (4% skim milk powder in tris-  
196 buffered saline and 0.1% Tween-20) at room temperature and developed to detect His-  
197 tagged recombinant protein.

198



199           2.7. *TcGST* activity (*E.C. 2.5.1.18*)

200                     *TcGST* enzyme activity was measured at 25 °C by monitoring the conjugation  
201           of 1-chloro-2,4-dinitrobenzene (CDNB) to the thiol group of L-glutathione. The  
202           reaction product absorbs at 340 nm and the rate of increase in the absorption is directly  
203           proportional to *TcGST* activity. The final reaction mixture (1 ml) contained assay  
204           buffer, enzyme mix, enzyme developer, recombinant protein (50 µg) and the substrate  
205           CDNB.

206           (1) The optimum pH was determined over a pH range 6 to 9 with a substrate  
207           concentration of 5 mM glutathione and 1 mM CDNB. Subsequent assays were carried  
208           out at pH 7.

209           (2) The apparent  $K_m$  for CDNB was determined in reaction mixtures containing 0-5  
210           mM CDNB and 5 mM L-glutathione at pH 7.

211

212           2.8 *ELISA*

213                     Pooled serum and saliva samples collected from parasite-naive and parasite-  
214           exposed sheep were tested by ELISA for the presence of antibodies that react with  
215           recombinant *TcGST*. Serum and saliva samples were collected from 18 male 6-7  
216           months-old Romney lambs previously exposed to multiple species of parasite,  
217           including *H. contortus* and *T. circumcincta*. These lambs had developed immunity  
218           against *T. circumcincta* infection. 5 µg/ml *TcGST* were immobilised onto ELISA  
219           plates (Maxisorp, Thermofisher Scientific), free binding sites were blocked with  
220           Superblock (Thermofisher Scientific) followed by incubation for 2 h at room  
221           temperature with serial dilutions of serum (200- to 6400-fold) or saliva (20- to 160-  
222           fold) in ELISA buffer for 2 h at room temperature. Bound serum immunoglobulins  
223           were detected by incubation for 2 h at 37 °C with 1:4000 diluted rabbit anti-sheep IgG-

224 HRP and colour development with 3,3',5,5'-tetramethylbenzidine (TMB). Salivary  
225 IgA was similarly detected with rabbit anti-sheep IgA-HRP.

226

## 227 2.9. Data analysis

228 Replicate data are presented as mean  $\pm$  SD. Graph Prism v5 was used to plot  
229 kinetic data and estimate  $K_m$  and  $V_{max}$ .

## 230 3. Results

231

### 232 3.1. TcGST gene sequence

233 The 615 bp full length *T. circumcincta* cDNA sequence, amplified from adult  
234 *T. circumcincta* cDNA, has been deposited in Genbank as Accession No. NX452942.  
235 Multiple alignments of the predicted TcGST protein of 205 amino acids were made  
236 with helminth homologues, using Alignment Geneious 8 (Fig. 1). There was 53-68%  
237 identity with proteins from *Ancylostoma ceylanicum*, *Ancylostoma duodenale*, *H.*  
238 *contortus*, *Heligmosomoides polygyrus*, *Necator americanus*, *Oesophagostomum*  
239 *dentatum*, *Nippostrongylus brasiliensis*, *Ancylostoma caninum*, *C. elegans* and  
240 *Caenorhabditis briggsae*. Identity was 26% or less with GST homologues from 9 other  
241 helminths. Substrate binding sites and conserved regions in other homologues were  
242 identified during protein modelling and are shown in Fig. 1.

243 In the second alignment of the amino-acid sequence of TcGST using PSI-  
244 BLAST, the protein sequence of TcGST had the highest similarity (64.4%) to the  
245 HcGST (HCON\_NP\_LOC15789) of *H. contortus* NZ\_Hco\_NP (Palevich et al., 2019a).  
246 This search also resulted in the assignment of a putative function to two of the top blast  
247 hits annotated as hypothetical protein (locus tag EYC01088 of *A. ceylanicum*) or

248 proteins of unknown function (locus tag VDO85500 of *H. polygyrus*) with 68% and  
249 63% identity respectively, based on the invertebrate non redundant (NR) database.

### 250 3.2. GST structure

251 The predicted 3D structures of *Tc*GST and *Hc*GST, and the binding and catalytic  
252 sites over a wide range of ligands are shown in Fig. 2. The protein structures for  
253 *Tc*GST and *Hc*GST were the superimposed best structural models corresponding to the  
254 monomer of [2ON5](#) (Asojo et al., 2007), associated with *Na*-GST-2 from the human  
255 hookworm *N. americanus*. The binding site and catalytic and active site residues that  
256 fall within 4 Å of the substrate (Tyr-8, Arg-14, Trp-39, Lys-43, Gly-49, Gln-50, Leu-  
257 51, Pro-52, Gln-63, Ser-64 and His-65) were similar in *Tc*GST and *Hc*GST (Fig. 2D).  
258 Both *Tc*GST and *Hc*GST had a TM Score of  $0.90 \pm 0.06$ , a root-mean-square deviation  
259 (RMSD) value of  $2.8 \pm 2.0$  Å and normalized z-scores were less than 6.05. The main  
260 difference between the two structures was that *Tc*GST had a C-score of 1.33, whereas  
261 *Hc*GST had a C-score of 1.32.

### 262 3.3. Recombinant protein expression

263 Maximal production of functional recombinant GST was obtained in the *E.*  
264 *coli* strain BL21 (DE3) when expression was induced with 0.2% L-arabinose for 3 h at  
265 37 °C. The purified N-terminal His recombinant *Tc*GST protein appeared as a single  
266 band of about 24 kDa on SDS-PAGE (Fig. 3A). The presence of a His-tagged  
267 recombinant protein was confirmed by Western blotting (Fig. 3B).

### 268 3.4. Enzyme activity

269 The optimum pH for recombinant *TcGST* activity at 25 °C was pH 7 (Fig. 4).  
270 The apparent  $K_m$  for CDNB was  $0.22 \pm 0.01$  mM and the  $V_{max}$   $1535 \pm 33$  nmoles  $min^{-1}$   
271  $mg^{-1}$  protein (mean  $\pm$  SD,  $n = 2$ ) (Fig. 4). The Hill coefficient was calculated to be 1.70.

### 272 3.5. Host recognition

273 Recombinant *TcGST* was recognised in an ELISA by antibodies in both serum  
274 and saliva collected from adult sheep exposed to nematodes in the field (Fig. 5). No  
275 antibody was detected when serum or saliva from parasite-naïve animals was used.

276

## 277 4. Discussion

278

279 This study showed the close structural relationship between a *T. circumcincta*  
280 GST (*TcGST*) and homologues from *H. contortus* and several animal parasitic  
281 nematodes and free-living species. This 615 bp full length cDNA sequence encoding  
282 *TcGST* was amplified from adult *T. circumcincta* cDNA, cloned and expressed in *E.*  
283 *coli* and the 205 amino acid *TcGST* protein was verified as a detoxifying enzyme  
284 capable of conjugating the substrate CDNB with L-glutathione. The protein was  
285 recognised by antibodies in both serum and saliva from field-immune sheep, but not  
286 nematode-naïve animals.

287 The GST superfamily is a large one, consisting of distantly related families of  
288 cytosolic and mitochondrial/microsomal enzymes, as well as membrane-bound  
289 glutathione and eicosanoid metabolising enzymes (Hayes and Pulford, 1995; Sheehan  
290 et al., 2001; Hayes et al., 2005; Board and Menon, 2013). The universal function of  
291 GST enzymes is detoxification of chemicals by catalysing their conjugation to the thiol  
292 group of glutathione before removal from the cell (Sheehan et al., 2001; Hayes et al.,  
293 2005; Cole and Deeley, 2006; Deponte, 2013). The *T. circumcincta* GST identified in

294 this study is likely to be only one of the GSTs expressed in this species, as helminths  
295 are known to express homologues of most GST classes (Brophy and Pritchard, 1994;  
296 Sheehan et al., 2001; Markov et al., 2015; Bae et al., 2016; Matoušová et al., 2016); the  
297 genome of *C. elegans* contains around 50 different GST proteins (Markov et al., 2015).  
298 Database searches in the present study indicated that two of the top blast hits currently  
299 annotated as a hypothetical protein (locus tag EYC01088 of *A. ceylanicum*) and a  
300 proteins of unknown function (locus tag VDO85500 of *H. polygyrus*) can be assigned  
301 putative functions as GSTs. As more sequences become available for comparison,  
302 functions are likely to be progressively assigned to the large number (about 50%) of the  
303 protein-coding genes in helminth genomes of unknown function (Palevich et al., 2018).

304 *TcGST* appears to belong to the nu GST class (Fig. 1), which may be a  
305 nematode-specific class, or possibly a subfamily of the sigma class (Markov et al.,  
306 2015), based on observations that proteins in the same GST class have sequence  
307 identity of at least 40%, contrasting with less than 25% between classes (Hayes et al.,  
308 2005; Oakley, 2011). These haem-binding proteins, which also bind haematin, have  
309 been characterised in the nematodes *H. contortus* (van Rossum et al., 2004),  
310 *Onchocerca volvulus* (Perbandt et al., 2005) and hookworms of the genera *Necator* and  
311 *Ancylostoma* (Zhan et al., 2005; Goud et al., 2012). Modelling the protein structures of  
312 *TcGST* and *HcGST* (Fig. 2) revealed that the best structural models corresponded to the  
313 monomer of [2ON5](#), associated with *N. americanus* *Na-GST-2* (Asojo et al., 2007). The  
314 searches of databases for other helminth GSTs allowed the assignment of a putative  
315 function as GSTs to two of the top blast hits currently annotated as a hypothetical  
316 protein (locus tag EYC01088 of *A. ceylanicum*) and a proteins of unknown function  
317 (locus tag VDO85500 of *H. polygyrus*). As more sequences become available for  
318 comparison, functions can become progressively assigned to the large number (about

319 50%) of the protein-coding genes in helminth genomes of unknown function (Palevich  
320 et al., 2018).

321 The universal function of GST enzymes is detoxification of chemicals by  
322 catalysing their conjugation to the thiol group of glutathione before removal from the  
323 cell (Sheehan et al., 2001; Hayes et al., 2005; Cole and Deeley, 2006; Deponete, 2013).  
324 Recombinant *Tc*GST conjugated the model substrate CDNB, with an optimum pH at 25  
325 °C of pH 7 (Fig. 5), similar to those for nu class *H. contortus* and *A. caninum* GST, and  
326 with high activity ( $V_{\max}$  1535 nmoles.min<sup>-1</sup>.mg protein<sup>-1</sup>), similar to that of rHcGST-1  
327 (van Rossum et al., 2004) and about twice that of Ac-GST-1 (Zhan et al., 2005).

328 GSTs have similar protein sequences (Fig. 1) containing a G-site, where  
329 glutathione binds, and the H-site, which is the non-specific substrate/chemical binding  
330 pocket where haem and haematin bind to nu class GSTs. These sites are shown in the  
331 proteins aligned in Fig. 1, where the triangles represent the largely conserved G-site and  
332 the asterisks the residues at the H-site. The molecular structures of nu class GSTs have  
333 been reported for HpolGSTN2-2 in *H. polygyrus* (Schuller et al., 2005), *Ov*-GST2 in  
334 *O. volvulus* (Perbandt et al., 2005) and *Na*-GST-2 and *Na*-GST-2 in *N. americanus*  
335 (Asojo et al., 2007) and compared with closely related sigma class GSTs, such as *Na*-  
336 GST-3 in *N. americanus* (Kelleher et al., 2013). The best structural models of *Tc*GST  
337 and *Hc*GST (Fig. 2) corresponded to the monomer of *N. americanus* *Na*-GST-2 with  
338 similar catalytic and active site residues within 4 Å of the substrate at Tyr-8, Phe-9,  
339 Trp-39, Lys-43, Gln-50, Leu-51, Pro-52, Gln-63, Ser-64 and Val-65. Like other nu  
340 class GSTs, the overall binding cavities were more open and probably therefore more  
341 accessible to diverse ligands than other GSTs.

342 Nu class GSTs participate in nematode haem metabolism through their ability  
343 to bind both haem and haematin. Nematodes are unable to synthesise haem and require

344 either an external source or a symbiont to supply haem, as well as transporters for its  
345 uptake across cell membranes and between tissues (Perally et al., 2008). Parasitic  
346 nematodes acquire haem from erythrocytes, host tissues and gut bacteria. A number of  
347 haem-responsive genes have been identified in nematodes, including the *C. elegans*  
348 transmembrane transporters *Ce-hrg-2*, expressed in the epidermis (Chen et al., 2012),  
349 and the *H. contortus* homolog *Hc-hrg-2*, which is expressed in all life cycle stages, but  
350 at the highest levels in L3 (Chen et al., 2012; Zhou et al., 2020). *A. ceylanicum* *Ace-*  
351 *GST*, a homolog of *Ac-GST* and *Na-GST-1*, is located in the epidermis, muscle and  
352 intestine of adult worms (Hang et al., 2020).

353           Recombinant helminth GSTs are showing promising results as vaccine  
354 antigens (Da Costa et al., 1999; Zhan et al., 2005, 2010; Preyavichyapugdee et al.,  
355 2008, Hang et al., 2020). Native *T. circumcincta* GST is highly antigenic and  
356 antibodies in both serum and saliva from field-immune sheep recognised recombinant  
357 *TcGST* in an ELISA (Fig. 7), suggesting it also may be a useful antigen for inclusion in  
358 further studies to assess the protective efficacy of recombinant *TcGST* in sheep and  
359 goats.

360

### 361 **Acknowledgments**

362 The authors would like to thank Dr Jacqui Knight for the initial database search and Drs  
363 Sandeep Gupta and Sofia Khanum for critically reviewing the manuscript. The  
364 financial support of AGMARDT (Grant No. P14003) is gratefully acknowledged.

### 365 **References**

- 366 Altschul, S.F., Madden, T.L., Schäffer A.A., Zhang, J., Zhang, Z., Miller, W., Lipman,  
367 D.J., 1997. Gapped BLAST and PSI-BLAST: a new generation of protein database  
368 search programs. *Nucleic Acids Res.* 25, 3389-3402.
- 369 Asojo, O.A., Homma, K., Sedlacek, M. Ngamelue, M., Goud, G.N., Zhan, B., Deumic,  
370 V., Asojo, O., Hotez, P.J., 2007. X-ray structures of *Na*-GST-1 and *Na*-GST-2 two  
371 glutathione s-transferase from the human hookworm *Necator americanus*. *BMC*  
372 *Struct. Biol.* 7, 42.
- 373 Bae, Y.-A., Kim, J.-G., Kong, Y., 2016. Phylogenetic characterization of *Clonorchis*  
374 *sinensis* proteins homologous to the sigma-class glutathione transferase and their  
375 differential expression profiles. *Mol. Biochem. Parasitol.* 206, 46-55.
- 376 Blocki, F.A., Ellis, L.B.M., Wackett, L.P., 1993. MIF protein are theta-class glutathione  
377 S-transferase homologs. *Prot. Sci.* 2, 2095-2102.
- 378 Board, P.G., Menon, D., 2013. Glutathione transferases, regulators of cellular  
379 metabolism and physiology. *Biochim. Biophys. Acta* 1830, 3267-3288.
- 380 Brophy, P.M., Barrett, J., 1990. Glutathione transferase in helminths. *Parasitology* 100,  
381 345-349.
- 382 Brophy, P.M., Pritchard, D.I., 1994. Parasitic helminth glutathione S-transferases: an  
383 update on their potential as targets for immuno- and chemotherapy. *Exp. Parasitol.*  
384 79, 89-96.
- 385 Campbell, A.M., Teesdale-Spittle, P.H., Barrett, J., Liebau, E., Jefferies, J.R., Brophy,  
386 P.M., 2001. A common class of nematode glutathione S-transferase (GST) revealed  
387 by the theoretical proteome of the model organism *Caenorhabditis elegans*. *Comp.*  
388 *Biochem. Physiol. B* 128, 701-708.



- 389 Chen, C., Samuel. T.K., Krause, M., Dailey, H.A., Hamza, I., 2012. Heme utilization in  
390 the *Caenorhabditis elegans* hypodermal cells is facilitated by heme-responsive gene-  
391 2. J. Biol. Chem. 287, 9601-9612.
- 392 Cole, S.P.C., Deeley, R.G., 2006. Transport of glutathione and glutathione conjugates  
393 by MRP1. Trend. Pharm. Sci. 27, 438-448.
- 394 Da Costa, A., Gaubert, S., Lafitte, S., Fontaine, J., Capron, A., Grzych, J-M., 1999.  
395 Egg-hatching in mice immunized with recombinant *Schistosoma bovis* 28kDa  
396 glutathione S-transferase. Parasit.e Immunol. 21, 341-350.
- 397 Deponte, M., 2013. Glutathione catalysis and the reaction mechanisms of glutathione-  
398 dependent enzymes. Biochim. Biophys. Acta 1830, 3217-3266.
- 399 Flanagan, J.U., Smythe, M.L., 2011. Sigma-class glutathione transferases. Drug Metab.  
400 Rev. 43, 194-214.
- 401 Goud, G.N., Deumic, V., Gupta, R., Brelsford, J., Zhan, B., Gillespie, P., Plieskatt, J.L.,  
402 Tsao, E.I., Hotez, P.J., Bottazzi, M.E., 2012. Expression, purification, and molecular  
403 analysis of the *Necator americanus* glutathione S-transferase 1 (*Na*-GST-1): A  
404 production process developed for a lead candidate recombinant hookworm vaccine  
405 antigen. Protein Expr. Purif. 83, 145-151.
- 406 Hayes, J.D., Flanagan, J.U., Jowsey, I.R., 2005. Glutathione transferases. Annu. Rev.  
407 Pharmacol. Toxicol. 45, 51-88.
- 408 Hayes, J.D., Pulford, D.J., 1995. The glutathione S-transferase supergene family:  
409 regulation of GST and the contribution of the isoenzymes to cancer chemoprotection  
410 and drug resistance. Crit. Rev. Biochem. Mol. Biol. 30, 445-600.
- 411 Kelleher, A., Zhan, B., Asojo, O.A., 2013. Structure of monomeric *Na*-GST-3, a  
412 glutathione S-transferase from the major human hookworm parasite *Necator*  
413 *americanus*. Acta Crystallogr. F 69, 839-843.

- 414 Knight, J.S., Broadwell, A.H., Grant, W.N., Shoemaker, C.B., 2004. A strategy for  
415 shuffling numerous *Bacillus thuringiensis* crystal protein domains. J. Econ.  
416 Entomol. 9, 1805-1813.
- 417 Laskowski, R.A., Rullmann, J.A.C., MacArthur, M.W., Kaptein, R., Thornton, J.M.,  
418 1996. AQUA and PROCHECK-NMR: programs for checking the quality of protein  
419 structures solved by NMR. J. Biomol. NMR 8, 477–486.
- 420 Markov, G.V., Baskaran, P., Sommer, R.J., 2015. The same or not the same: lineage-  
421 specific gene expansions and homology relationships in multigene families in  
422 nematodes. J. Mol. Evol. 80, 18-36.
- 423 Matousková, P., Vokrál, I., Lamka, J., Skálová, L., 2016. The role of xenobiotic  
424 metabolizing enzymes in anthelmintic deactivation and resistance in helminths.  
425 Trend. Parasitol. 32, 481- 491.
- 426 Morel, F., Aninat, C., 2011. The glutathione transferase kappa family. Drug Metab.  
427 Rev. 43, 281-291.
- 428 Oakley, A. 2011. Glutathione transferases: a structural perspective. Drug Metab. Rev.  
429 43, 138-151.
- 430 Palevich, N., Britton, C., Kamenetzky, L., Mitreva, M., de Moraes Mourão, M.,  
431 Bennuru, S., Quack, T., Scholte, L.L.S., Tyagi, R., Slatko, B. E. 2018. Tackling  
432 hypotheticals in helminth genomes. Trend. Parasitol. 34, 179-183.
- 433 Palevich, N., Maclean, P.H., Baten, A., Scott, R.W., Leathwick, D.M., 2019a. The  
434 genome sequence of the anthelmintic-susceptible New Zealand *Haemonchus*  
435 *contortus*. Genome Biol. Evol. 11, 1965-1970.
- 436 Palevich, N., Maclean, P.H., Baten, A., Scott, R.W., Leathwick, D.M., 2019b. The  
437 complete mitochondrial genome of the New Zealand parasitic roundworm

438           *Haemonchus contortus* (Trichostrongyloidea: Haemonchidae) field strain  
439           NZ\_Hco\_NP. Mitochondrial DNA B, 4, 2208-2210.

440           Perally, S., Lacourse E.J., Campbell, A.M., Brophy, P.M., 2008. Heme transport and  
441           detoxification in nematodes: subproteomics evidence of differential role of  
442           glutathione transferases. *J. Proteom. Res.* 7, 4557-4565.

443           Perbandt, M., Hoppner, J., Betzel, C., Walter, R.D., Liebau, E., 2005. Structure of the  
444           major cytosolic glutathione S-transferase from the parasitic nematode *Onchocerca*  
445           *volvulus*. *J. Biol. Chem.* 280, 12630-12636.

446           Petit, E., Michelet, X., Rauch, C., Bertrand-Michel, J., Terce, F., Legouis, R., Morel, F.,  
447           2009. Glutathione transferases kappa 1 and kappa 2 localize in peroxisomes and  
448           mitochondria, respectively, and are involved in lipid metabolism and respiration in  
449           *Caenorhabditis elegans*. *FEBS J.* 276, 5030-5040.

450           Preyavichyapugdee, N., Sahaphong, S., Riengrojpitak, S., Grams, R., Viyananay, V.,  
451           Sobhon, P., 2008. *Fasciola hepatica* and *Schistosoma mansoni*: Vaccine potential of  
452           recombinant glutathione S-transferase (rFgGST26) against infections in mice. *Exp.*  
453           *Parasitol.* 119, 229-237.

454           Schuller, D.J., Liu, Q., Kriksunov, I.A., Campbell, A.M., Barrett, J., Brophy, P.M.,  
455           Hao, Q. 2005. Crystal structure of a new class of glutathione transferase from the  
456           model human hookworm nematode *Heligmosomoides polygyrus*. *Proteins* 61, 1024-  
457           1031.

458           Sheehan, D., Meade, G., Foley, V.M., Dowd, C.A., 2001. Structure, function and  
459           evolution of glutathione transferases: implications for classification of non-  
460           mammalian members of an ancient enzyme superfamily. *Biochem. J.* 360, 1-16.

- 461 Sparkes, A., De Baetselier, P., Roelants, K., De Trez, C., Magez, S., Van Ginderachter,  
462 J.A., Raes, G., Bucalaf, R., Stijlemans, B., 2017. The non-mammalian MIF  
463 superfamily. *Immunobiology* 222, 473-482.
- 464 Umair, S., Ria, C., Knight, J.S., Simpson, H.V., 2013. Sarcosine metabolism in  
465 *Haemonchus contortus* and *Teladorsagia circumcincta*. *Exp. Parasitol.* 134, 1–6.
- 466 Van Rossum, A.J., Jefferies, J.R., Rijsewijk, F.A.M., LaCourse, E.J., Teesdale-Spittle,  
467 P., Barrett, J., Tait, A., Brophy, P.M., 2004. Binding of hematin by a new class of  
468 glutathione transferase from the blood-feeding parasitic nematode *Haemonchus*  
469 *contortus*. *Infect. Immun.* 72, 2780-2790.
- 470 Wiederstein, M., Sippl, M.J., 2007. ProSA-web: interactive web service for the  
471 recognition of errors in three-dimensional structures of proteins. *Nucleic Acids Res.*  
472 35, W407–W410.
- 473 Yang, J., Yaan, R., Roy, A., Xu, D., Poisson, J., Zhang, Y., 2015. The I-TASSER Suite:  
474 Protein structure and function prediction. *Nat. Methods* 12, 7-8.
- 475 Zhan, B., Liu, S., Perally, S., Xue, J., Fujiwara, R., Brophy, P., Xiao, S., Liu, Y., Feng,  
476 J., Williamson, A., Wang, Y., Bueno, L.L., Mendez, S., Goud, G., Bethony, J.M.,  
477 Hawdon, J.M., Loukas, A., Jones, K., Hotez, P.J., 2005. Biochemical  
478 characterization and vaccine potential of a heme-binding glutathione transferase  
479 from the adult hookworm *Ancylostoma caninum*. *Infect. Immun.*, 73, 6903-6911.
- 480 Zhan, B., Perally, S., Brophy, P.M., Xue, J., Goud, G., Liu, S., Deumic, V., de Oliveira,  
481 L.M., Bethony, J.M., Bottazzi, M.E., Jiang, D., Gillespie, P., Xiao, S., Gupta, R.,  
482 Loukas, A., Ranjit, N., Lustigman, S., Oksov, Y., Hotez, P.J., 2010. Molecular  
483 cloning, biochemical characterization, and partial protective immunity of the heme-  
484 binding glutathione s-transferases from the human hookworm *Necator americanus*.  
485 *Infect. Immun.*, 78, 1552-1563.

486 Zhang, Y., Skolnick, J. 2004. Scoring function for automated assessment of protein  
487 structure template quality, *Proteins* 57, 702-710.

488

489 **Figure Legends**

490

491 **Fig. 1.** Multiple sequence alignment of *TcGST* with homologues from *Ancylostoma*  
492 *ceylanicum* (EYC01088), *Ancylostoma duodenale* (GI: KIH60339), *Haemonchus*  
493 *contortus* (GI: AAF81283), *Heligmosomoides polygyrus* (GI: VDO85500), *Necator*  
494 *americanus* (GI: ACX53263), *Oesophagostomum dentatum* (GI: KHJ77903),  
495 *Nippostrongylus brasiliensis* (GI: VDL81310), *Ancylostoma caninum* (GI: AAT37718),  
496 *Caenorhabditis elegans* (GI: CCD62662), *Caenorhabditis briggsae* (GI: XP002631478),  
497 *Trichinella spiralis* (GI: ABA42914), *Dirofilaria immitis* (GI: AAA21585), *Ascaris*  
498 *lumbricoides* (GI: ATZ35993), *Onchocerca volvulus* (GI: CAA54568), *Fasciola gigantica*  
499 (GI: ACH88355), *Fasciola hepatica* (GI: ADP09370), *Schistosoma japonicum* (GI:  
500 62738608), *Schistosoma bovis* (GI: RTG90762) and *Schistosoma mansoni* (GI:  
501 AAA29888) homologues. The % identity of the helminth GST with that of *T.*  
502 *circumcincta* is shown at the end of the alignment. The triangles represent the non-specific  
503 substrate/chemical binding pocket, the H-site and those with an asterisk (\*) represent the  
504 GSH-binding G-site. The % homology of each sequence with *TcGST* is shown at the end  
505 of the alignment.

506

507 **Fig. 2.** The predicted tertiary structure of the *TcGST* and *HcGST* monomers. (A) Location  
508 of the C- and N-termini in the predicted tertiary structure of *TcGST*. (B) Superposition of  
509 the predicted tertiary structure of *TcGST* from *T. circumcincta* (red) and *H. contortus* GST  
510 (blue). (C) Location of the active site within *TcGST*. (D) The active site of *TcGST* (green)  
511 within 4Å of the superimposed 2CA8 (salmon) with polar bonds also shown in yellow.

512

513 **Fig. 3.** Purified recombinant *Tc*GST on a NuPage™ 4 - 12% Bis-Tris protein gel stained  
514 with SimplyBlue safe stain. Lane 1: Seeblue™ plus 2 Pre-stained protein standard in Kda;  
515 Lane 2: Filtered soluble bacterial lysate; Lane 3: Unbound material to HisTrap column;  
516 Lane 4: Elution fraction (purified recombinant *Tc*GST indicated by the black arrow).

517 **Fig. 4.** Effects of pH (top) and varying the substrate concentration at pH 7 (bottom) on the  
518 enzyme activity (mean  $\pm$  SD, n = 2) of recombinant *Tc*GST at 25 °C. Activity was  
519 calculated from the conjugation of L-glutathione and 1-chloro-2,4-dinitrobenzene,  
520 monitored spectrophotometrically at 340 nm.

521

522 **Fig. 5.** Recognition of recombinant *Tc*GST by serially diluted immune serum (IgG) (top)  
523 or saliva (IgA) (bottom) (■), but not by parasite-naïve serum or saliva (●).

524

|                            |    |                                                                 |     |
|----------------------------|----|-----------------------------------------------------------------|-----|
|                            | 1  |                                                                 | 60  |
|                            |    | * * * * *                                                       |     |
| <i>TcGST</i>               |    | MVHYRLLYFDGRGRAEVAR-QLFALANQEYVDV--RITHEEWPKHKPEM--PFGQLPVL     |     |
| <i>A. ceylanicum GST</i>   |    | MVHYKLTYFNDRGAAEIIIR-QLFVLADQEYEDV--RLTHEEWPKHKAEM--PFGQLPVL    |     |
| <i>A. duodenale GST</i>    |    | MVHYKLTYFDGRGAAEIIIR-QVFALAGQEYEDV--RLSFEWPKHKAEM--PFGQLPVL     |     |
| <i>H. contortus GST</i>    |    | MVHYKLTYFNDRGAAEIIIR-QVFVLAGQDYEDV--RLTHEEWPKHKASM--PFGQLPVL    |     |
| <i>H. polygyrus GST</i>    |    | MVHYKLIYFNDRGAAEIIIR-QLFVIAGKEYEDV--RLTFEEWPKYKPEM--PFGQVPVL    |     |
| <i>N. americanus GST</i>   |    | MVHYKLTYFDGRGAAEIIIR-QIFVLAGQEYEDI--RLSHDEWPKYKNEM--PFGQLPVL    |     |
| <i>O. dentatum GST</i>     |    | -----MTYLCSRNLRLMSKEQIFALAGQDYEDV--RYTFEEWPKHKDEM--PFGQMPVL     |     |
| <i>N. brasiliensis GST</i> |    | -----MNLKIFVLAGQEYDDV--RLSREEWPKIKAEM--PFGQIPVL                 |     |
| <i>A. caninum GST</i>      |    | MVHYKLTYFNDRGLGECAR-QLFALADQQYEDI--RVTHEDFPEIKPNL--PFGQLPLL     |     |
| <i>C. elegans GST</i>      |    | MVSYKLTYFNDRGAGEVSR-QIFAYAGQQYEDN--RVTQEQWPALKETCAAPFGQLPFL     |     |
| <i>C. briggsae GST</i>     |    | MVAYKLTYFNDRGAGEVIR-QIFAHAGQDFEDV--RVTMEQWPALKAGT--PFGQLPVL     |     |
| <i>T. spiralis GST</i>     |    | MPLYKLVYFPIRGLAEPPIR-LLLHDQRVEFLDN--RIQQKDWPEIKSQM--LFGQVPCL    |     |
| <i>D. immitis GST</i>      |    | -MSYKLTYFPIRGLAEPPIR-LLLVDQGIKFTDE--HIPKDDFVSIKSQF--QFGQLPCF    |     |
| <i>A. lumbricoides GST</i> |    | -MGYKVTYFAIRGLAEPPIR-LLLTDDHEIPFDDA--RIKDLAEWQSVKHQF--QFGQVPCL  |     |
| <i>O. volvulus GST</i>     |    | -MSYKLTYFSIRGLAEPPIR-LFLVDQDIKFIDD--RIAKDDFSSIKSQF--QFGQLPCL    |     |
| <i>F. gigantica GST</i>    |    | -MPAKLGYWKIRGLQQPVR-LLLEYLDEEYEEHLYGRDDREKWLGDKFNMGDLPLNLPYY    |     |
| <i>F. hepatica GST</i>     |    | -MPAKLGYWKIRGLQQPVR-LLLEYLDEEYEEHLYGRDDREKWLGDKFNMGDLPLNLPYY    |     |
| <i>S. japonicum GST</i>    |    | --SPILGYWKIKGLVQPTR-LLLEYLDEEYEEHLYERDEGDKWRNKKFELGLEFPNLPYY    |     |
| <i>S. bovis GST</i>        |    | -----LVQPTR-LLLEYVGEVYEERLYDRNDGDVWRNEKFNGLGLEFPNLPYY           |     |
| <i>S. mansoni GST</i>      |    | -MAPKFGYWKVKGLVQPTR-LLLEHLEETYEERAYDRNEIDAWSNDKFKLGLGLEFPNLPYY  |     |
|                            | 61 |                                                                 | 120 |
|                            |    | * * *                                                           |     |
| <i>TcGST</i>               |    | DVDGKLLGQSHAINRYLARQFGFAGKSPFEEALVDAFADQYRDFYTEAQPPLYAVWGFVK    |     |
| <i>A. ceylanicum GST</i>   |    | EVDGKQLAQSLAIVRFLARKKFGFAGKCPFEEALVDSIADQYKDFINEVIRPCLMVLGMGFAE |     |
| <i>A. duodenale GST</i>    |    | EVDGKQLAQSLAIVRFLARKKFGFAGKCPFEEALVDSIADQHKDFINEIRPFLRVAMGFDQ   |     |
| <i>H. contortus GST</i>    |    | EVDGKQLPQSVAVIRYLARKKFGYAGKSAWEEAVVDSIADQFKDFLNEVIRPYFKVLLGMDQ  |     |
| <i>H. polygyrus GST</i>    |    | EIDGQKLAQSLAIVRFLAREFGYAGKTPFEEALVDSIGDQYKDFVNEARPYFRVALGFQE    |     |
| <i>N. americanus GST</i>   |    | EVDGKLAQSFARFVAKKFGFAGKCPFEEALVDSITDQYKDFINEIRPFLRVAMGFAE       |     |
| <i>O. dentatum GST</i>     |    | EVDGKQLAQSFARFVAKKFGFAGKTPFEEALVDSIADQFKDFSIECRPIAKVVMGFQE      |     |
| <i>N. brasiliensis GST</i> |    | EVDGKLAQSSAIARYVARQFGYAGKNAFDEALVDSLVDQWKDFNEARPYFMVLLGFQE      |     |
| <i>A. caninum GST</i>      |    | NEDGKELAQSNAINRYLARQFGFAGKTPFEEALVDSLADQMTDYRVEIKPFVYTAYGHQK    |     |
| <i>C. elegans GST</i>      |    | EVDGKLAQSHAIRFLAREFKLNGKTAWEEAQNLSLADQYKDYSSSEARPYFYAVMGFGP     |     |
| <i>C. briggsae GST</i>     |    | EVDGKPLAQSHAIRYLAREFKLNGQCPWEEAQNALSQDFKDYSSSEAKPYFYAKMGFGP     |     |



*T. spiralis* GST YEDDQPIVQSGAIMRHLGRRFGLYGNAE-EMTYVDQIYEGVVDLRLKYARLIYSD-----  
*D. immitis* GST YDGDQQIVQSGAILRHLARKFNLNGENNAETS YVDMFYEGIRDLHSHKYTRMIYEA-----  
*A. lumbricoides* GST HDDNEQIVQSGAILRHLARKHNLNGSNENEATYADM FYEGIRDLHMKYTKMIYHA-----  
*O. volvulus* GST YDGDQQIVQSGAILRHLARKYNLNGENEMETTYIDMFCEGVRDLHVKYTRMIYMA-----  
*F. gigantica* GST IDDKCKLTQSVAIMRYIADKHGMLGSTPEERARVSMIEGAAMD LRMGFVVRVCYNP-----  
*F. hepatica* GST IDDKCKLTQSVAIMRYIADKHGMLGSTPEERARISMIEGAAMD LRMGFVVRVCYNP-----  
*S. japonicum* GST IDGDVKLTQSMAIRYIADKHNLGGCPKERA EISMLEGAVLDIRYGVSR IAYSK-----  
*S. bovis* GST IDGDVKLTQSMAILRYIADKHNLGGCPKERA EISMLEGAILDIRLGVSR IAYNK-----  
*S. mansoni* GST IDGDFKLTQSMAIRYIADKHNLGACPKERA EISMLEGAVLDIRMGVLR IAYNK-----

121 180  
 | |  
 TcGST -GDVNALENEKFAPARDKFFNLMTKHLK--ASKSGFLVGDSVTWADLQLAE-LATFTEKY  
*A. ceylanicum* GST -GDLEKLTKELLL PAREKFFFGFMTKFLK--ESKSGYLVGDSLTFADLYLAETS AEFVKKF  
*A. duodenale* GST -GDVEKLAKELFLPAREKFFFGFMTKFLK--ESKSGYLVGDSLTYADLYLAESS AEFAKKF  
*H. contortus* GST -GDLKALEKDVFE PARQKFFFTIVTKILK--ENKTGYLVGDSLTFADLYVAE-MTTFTEHY  
*H. polygyrus* GST -GDEAALAKDVFLPAREKFLT FMTKFLN--QSKSGYLVGDSL TWADLVLAE-MAEVAKKV  
*N. americanus* GST -GDLEKLSNEVFLPAREKFFFGFMTNFKL--ESKSGYLVGDSLTFADLYLAECASEFAKKT  
*O. dentatum* GST -GDVEKLTKEVFN PARDKFFGYVTKFLK--ASKSGYLVGDSLTFADLYLAETTSEFVKKV  
*N. brasiliensis* GST -GDADAVAKQLVLPAREKFFFTITKFIK--NSNSGFLVGDSVTWVDLIVAE-LATQYELV  
*A. caninum* GST FGDLETLK KDVMLPARDKFLGFITKFLK--NNPSGFLVGDSVTWIDL LLAEHASDIQSKV  
*C. elegans* GST -GDVETLKKDIFLPAFEKFFYGFVFNFLK--ASGSGFLVGDSL TWIDLAI AQHSADLIAKG  
*C. briggsae* GST -GDVETLKKDVFLPAFEKFFFTFLSNFLK--ASGSGFLVGKSL TWIDLAVAQHSADLIAQG  
*T. spiralis* GST --SFHESKGFINEVLPDELAKFEKILT---GKKYILDDEITFADYALAE LLDVLLILS  
*D. immitis* GST ---YETQKDPFIKNILPQELAKLEKLLATRDNGKNFILGDKISFADYVLFEE LDVQQIILD  
*A. lumbricoides* GST ---YETEKDSFIKDILPVELAKFEKLLATRGGGAGYILGDKICFADYVLFEE LDIMQIILD  
*O. volvulus* GST ---YETEKDPYIKSILPGELAKFEKLLATRGNRNLILGDKISYADYALFEE LDVHQIILD  
*F. gigantica* GST --NFEEVKGDYLKE-LPKTLKMWSDFLG----DRQYLTGSSVSHVDFMVYEALDCIRYLA  
*F. hepatica* GST --KFEEVKGDYLKE-LPTTLKMWSNFLG----DRHYLTGSSVSHVDFMVYEALDCIRYLA  
*S. japonicum* GST --DFETLKVDFLSK-LPEMLKMFEDRLC----HKTYLNGDHVTHPDFMLYDALDVVLYMD  
*S. bovis* GST --EFETLKVGFLNQ-LPGMLKMFENRLS----HKIYLN GDNVTHVDFMLYDALDVVLYMD  
*S. mansoni* GST --EYETLKVDFLNK-LPGRLKMFEDRLS----NKTYLNGNCVTHPDFMLYDALDVVLYMD

|                            | 181                                                         | 240   | % identity |
|----------------------------|-------------------------------------------------------------|-------|------------|
| <i>TcGST</i>               |                                                             |       | -          |
| <i>A. ceylanicum</i> GST   | ATLYVGFPEVKAHSEKVRSIPEIKKRIETRKNTPF-----                    | ----- | [68%]      |
| <i>A. duodenale</i> GST    | PTIYDGFPEVKAHAEKVRSNPALKKKWIETRPETKF-----                   | ----- | [66%]      |
| <i>H. contortus</i> GST    | PKLYDGFPEVKAHAEKVRSNPALKKKWIETRPASKF-----                   | ----- | [64%]      |
| <i>H. polygyrus</i> GST    | PTLYDGFPEAKAHSEKIRSIPALAKWLQTRPETKF-----                    | ----- | [63%]      |
| <i>N. americanus</i> GST   | PTIFDGFPEIKAHAEKVRSNPALKKKWIETRPETKF-----                   | ----- | [63%]      |
| <i>O. dentatum</i> GST     | PTLYDGFPEVKAHAEKVRSNPALKKKWIETRPQTSF-----                   | ----- | [62%]      |
| <i>N. brasiliensis</i> GST | PDFYKGFPEVKAHSEKVRSLPALKKKWIETRPDTPF-----                   | ----- | [61%]      |
| <i>A. caninum</i> GST      | PEYLEGFPEVKAHMEKVRSLPKLKKWIETTPDTHF-----                    | ----- | [60%]      |
| <i>C. elegans</i> GST      | GD-FSKFPELKAHAEKIQAI PQIKKWIETRPVTPF-----                   | ----- | [55%]      |
| <i>C. briggsae</i> GST     | ID-FSKFQDLKAHSEKIQAIPQIKKWIDSRPETPF-----                    | ----- | [53%]      |
| <i>T. spiralis</i> GST     | SSCLENFTALTIYHSRFMNRPNLKRYLSSDIRKNAKINGNENK-----            | ----- | [26%]      |
| <i>D. immitis</i> GST      | PHCLEKFPLLKAFHQRLGDKPKIKEYCAKRNASKMPVNGNGKQ-----            | ----- | [26%]      |
| <i>A. lumbricoides</i> GST | PHALDKFPTLKAHQRLDRPLIKAYYQKRAEAKVPVNGNGKQ-----              | ----- | [25%]      |
| <i>O. volvulus</i> GST     | PHCLDKFPLLKAFHQRMKDRPKLKEYCEKRDAAKVPVNGNGKQ-----            | ----- | [25%]      |
| <i>F. gigantica</i> GST    | PQCLNDFPKLKEFKSRIEDLPKIKAYMESEKFIKWPLNSWTASFGGGDAAPA-----   | ----- | [23%]      |
| <i>F. hepatica</i> GST     | PQCLEDFPKLKEFKSRIEDLPKIKAYMESEKFIKWPLNSWSASFGGGDAAPA-----   | ----- | [22%]      |
| <i>S. japonicum</i> GST    | PMCLDAFPKLVCFKKRIEAI PQIDKYLKSSKYIAWPLQGWSAIFGGGDHPPKSDLVPR | ----- | [22%]      |
| <i>S. bovis</i> GST        | PKCLDAFPKLI SFKQRIENL PPIKNYLNSDRHIKWPLQGWSAIFGGGDAPPK----- | ----- | [19%]      |
| <i>S. mansoni</i> GST      | SQCLNEFPKLV SFKKCIEDLPQIKNYLNSRYIKWPLQGW DATFGGGDTPPK-----  | ----- | [19%]      |

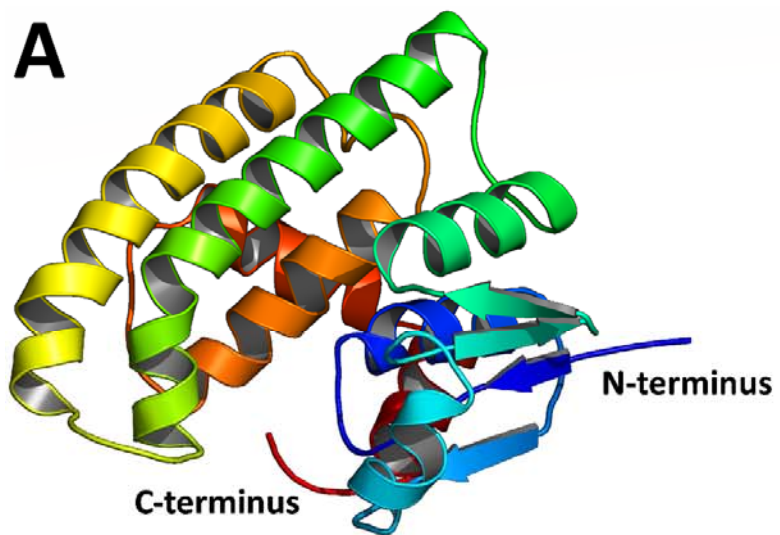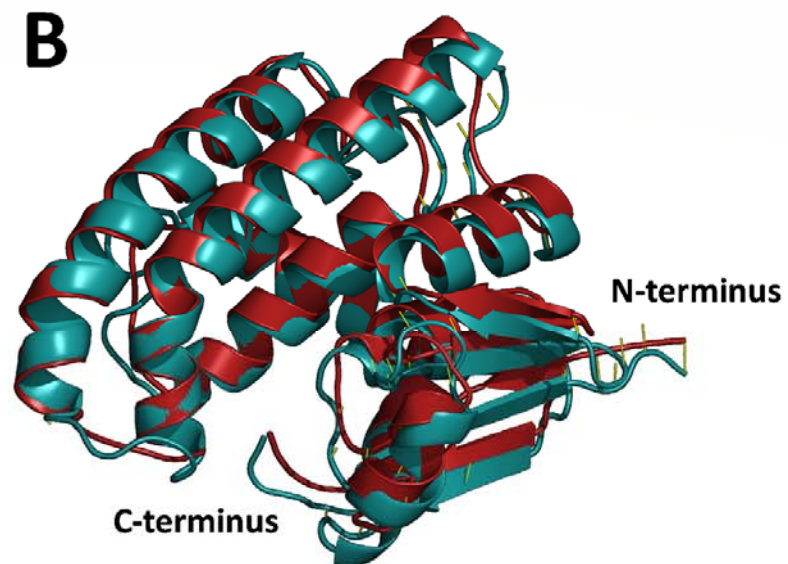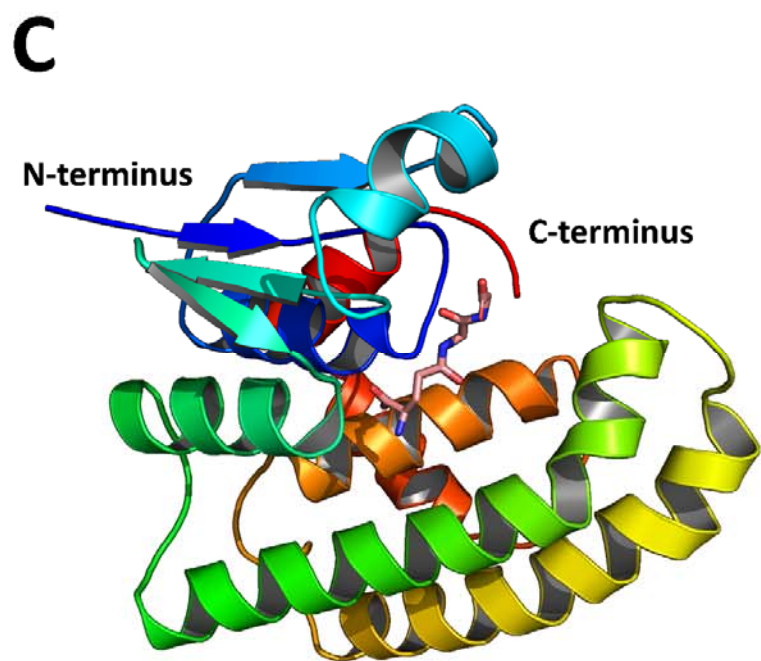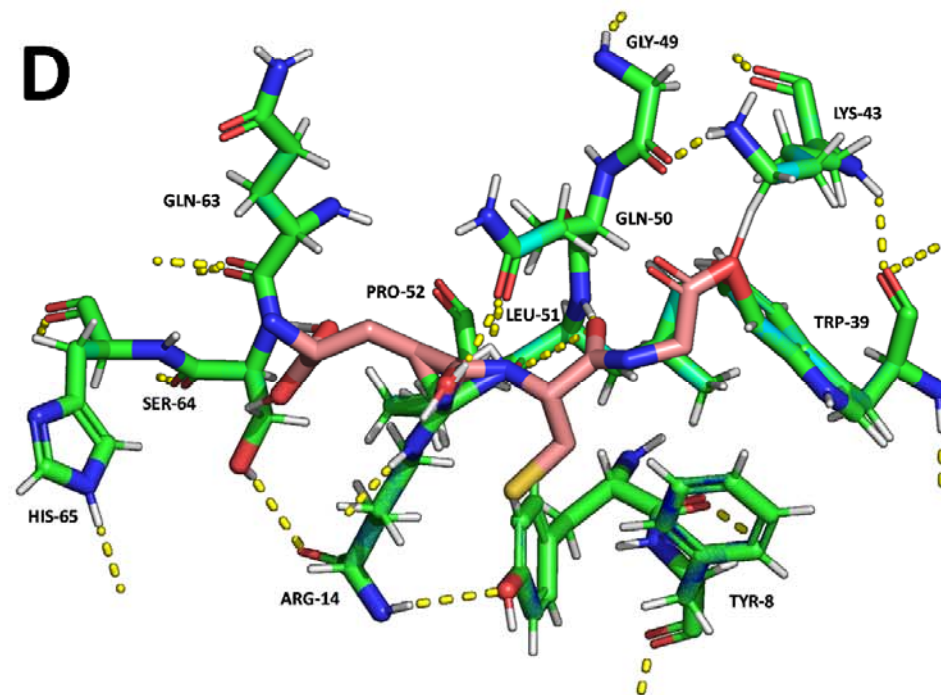

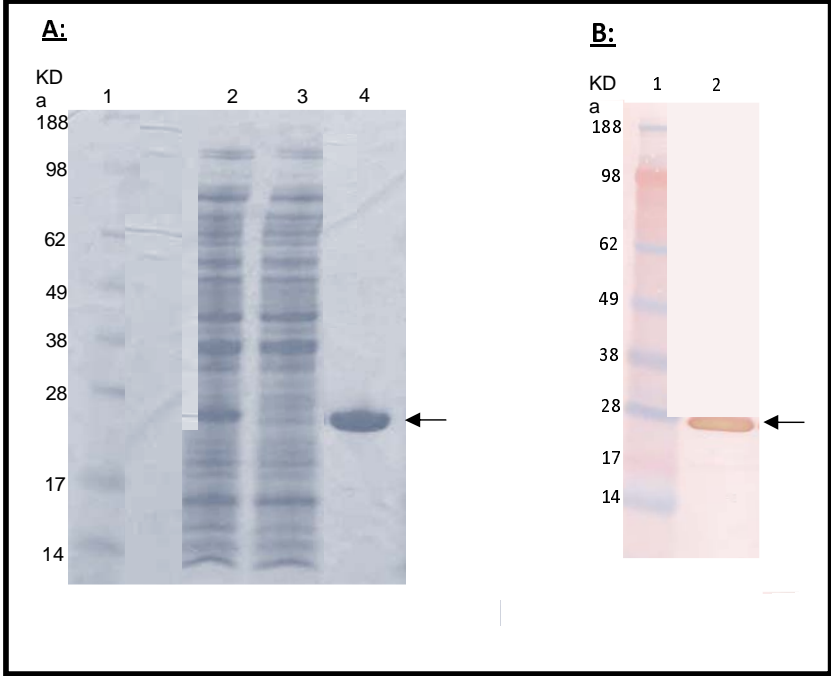

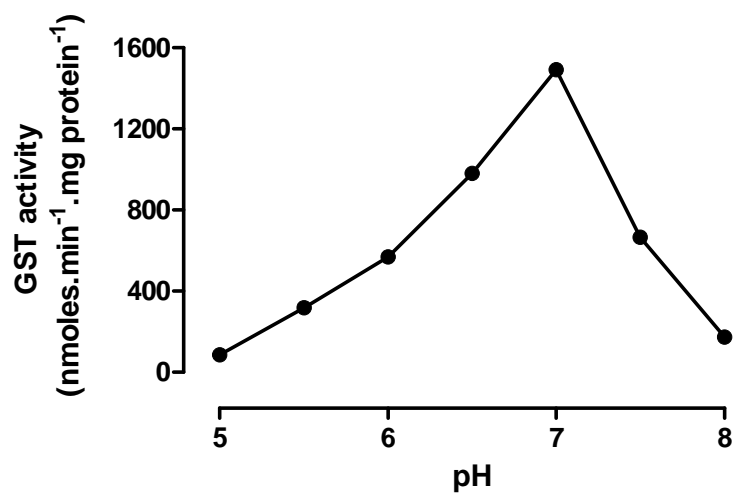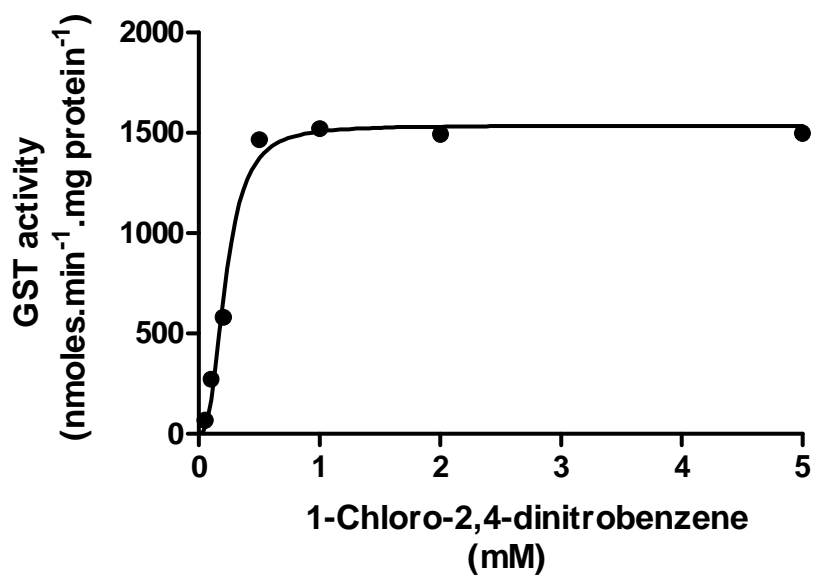

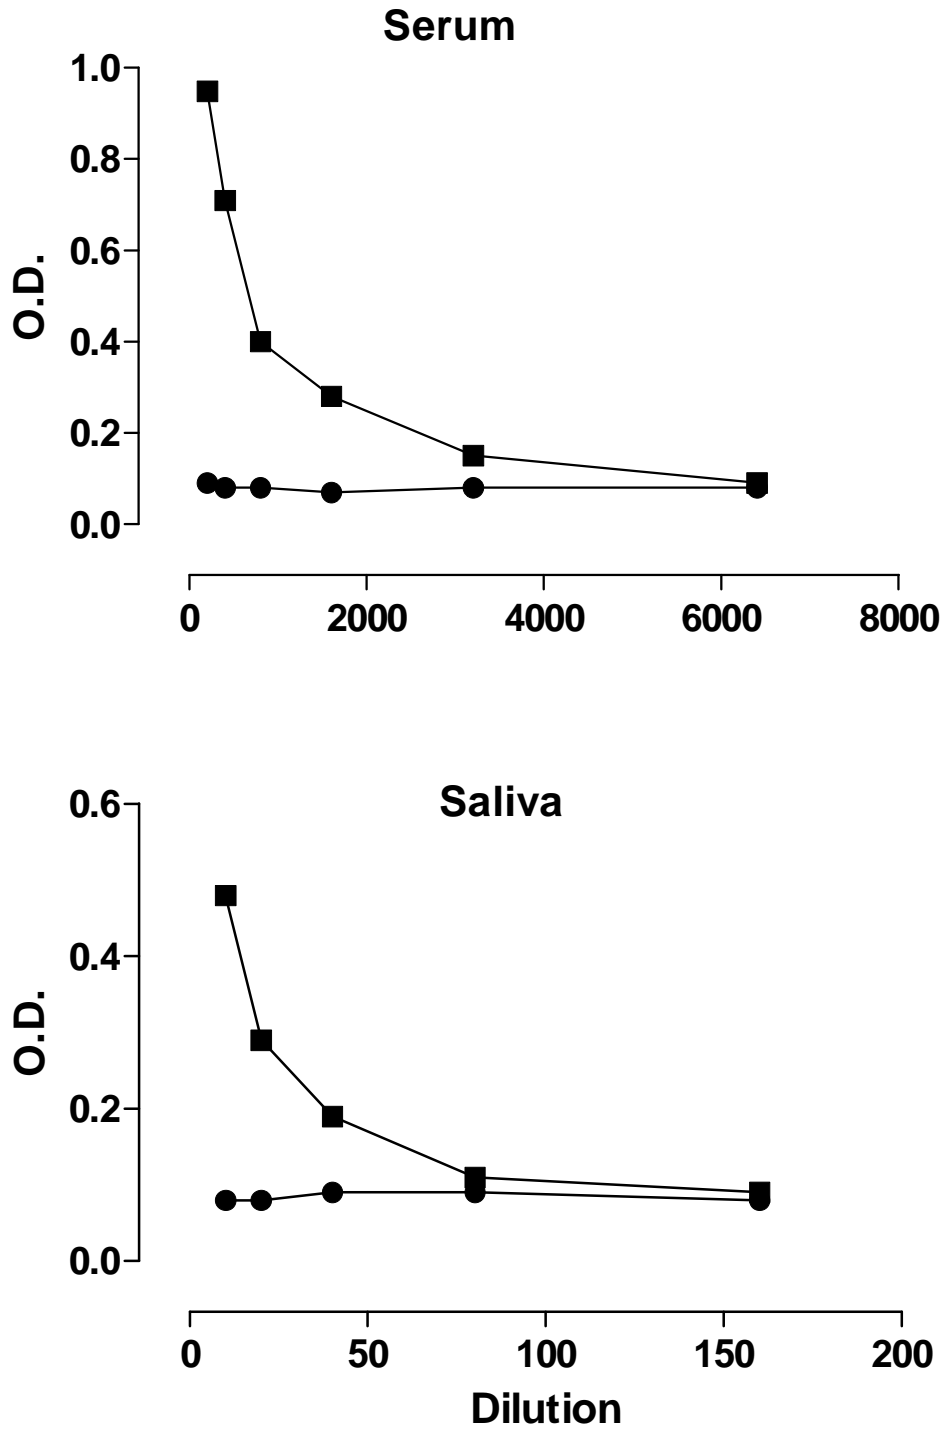

**Fig. 6.** Recognition of recombinant *Teci*GST by serially diluted immune serum (IgG) (top) or saliva (IgA) (bottom) (■), but not by parasite-naïve serum or saliva (●).
